# Supplementary material for: Human MAIT cells respond to and suppress HIV-1
Source: eLife. 2021 Dec 24;10:e50324. doi: 10.7554/eLife.50324 (PMC8752121; doi:10.7554/eLife.50324)
Supplement: Figure 1—source data 1. — (B) GzmB, PD-1, and TIM-3 expression levels on MAIT cells during PHI and CHI HIV-1 infection. Fig. Suppl.(1) TIM-3 expression levels on MAIT cells in EC and VC. [file elife-50324-fig1-data1.xlsx]

## Sheet: Sheet1
1B			GzmB							PD-1								TIM-3				Figure supplement 1
		PHI	PHI	CHI	CHI				PHI	PHI	CHI	CHI					PHI	PHI	CHI	CHI
Sample	HC	BL	1yr-Tx	BL	1yr-Tx		Sample	HC	BL	1yr-Tx	BL	1yr-Tx			Sample	HC	BL	1yr-Tx	BL	1yr-Tx		Sample	HC	EC	VC
1	0	5.45	3	93.9	4.83		1	0.93	7.27	3	33.7	3.45			1	1.49	5.84	2.66	22	0.69		1	1.49	5.99	33.3
2	0	57.9	1.09	65.7	35.4		2	1.81	10.5	1.09	11.2	19.2			2	0.11	4.36	2.12	14.6	7.5		2	0.11	5.14	1.56
3	0.15	3.51	10.7	94	15.2		3	0.89	5.79	4.7	13.8	3.25			3	0.063	5.35	3.65	19.2	1.52		3	0.063	2.48	14.1
4	0	55	0.44	18.2	41.2		4	0.2	23.3	0.44	27.3	1.8			4	0.19	2.95	0.54	17.8	3.6		4	0.19	14.2	0
5	0	12.7	6.33	66.7	28.2		5	0.8	5.56	6.33	17.4	2.39			5	0.15	2.53	0.47	12.8	0.96		5	0.15	9.6	9.68
6	0.32	12.5	1.54	41.2	16.7		6	0.32	13.7	1.54	46.2	3.04			6		2.8	1.08	14	0.8		6		0.67	2.61
7	0	16.8		38.2			7	2.09	9.76		22.7				7				3.03			7		0.75	14.3
8	0.28	3.28		85			8	0.28	3.6		61.7				8				5			8		0.53
9		5.97		45.6			9		4.01		42.8				9				5.26			9		7.79
10		7.62		94.6			10		2.92		71				10				8.57			10		5.24
11				39.4			11				17.58											11		4.71
12				100			12				10
13				55			13				17.02
14				49.1			14				8.57
15				54.3
	HC= healthy control
	PHI= Primary HIV infection
	CHI= Chronic HIV infection
	EC=Elite controller
	VC=Viraemic controller
