# Supplementary material for: Human MAIT cells respond to and suppress HIV-1
Source: eLife. 2021 Dec 24;10:e50324. doi: 10.7554/eLife.50324 (PMC8752121; doi:10.7554/eLife.50324)
Supplement: Figure 2—source data 1. — (B) MAIT cell frequencies in HC compared to PHI, CHI, EC, and VCs at baseline. (C) MAIT cell frequencies during CHI at baseline and 1 year post-ART. (D) MAIT cell frequencies during PHI at baseline and 1 year post-ART. (E) longitudinal MAIT cell frequencies during CHI at 1, 3, and 5 years post-ART. (F) Comparison of MAIT cell frequencies between GALT and PBMC. (G) Presence of MAIT cells in rectum and terminal ileum of PHI ART-treated subjects. [file elife-50324-fig2-data1.xlsx]

## Sheet: Sheet1
2B		MAIT frequency					2C					2D				2E		Long-term ART				2F	Paired and Correaltion data			2G
								PHI	PHI				CHI	CHI
Sample	HC	PHI	CHI	EC	VC		Sample	BL	1yr-Tx			Sample	BL	1yr-Tx		Sample	1yr	3yr	5yr			Sample	GALT	PBMC		Sample	Rectum	Terminal Ileum
1	6.76	1.01	0.83	0.71	3		1	0.35	2.47			1	0.53	1.54		1	1.45	1.59	2.7			1	3.98	2.67		1	1.01	0.2
2	6.05	5.04	0.26	0.68	0.00718		2	0.77	0.67			2	2.83	2.92		2	1.68	0.95	1			2	2.14	0.74		2	3.98	2.14
3	7.83	4.76	0.19	1.33	0.6		3	0.54	0.44			3	1.99	1.36		3	4.81	2.23	3.61			3	3.44	1.6		3	1.37	3.04
4	21.3	0.14	0.37	0.46	0.15		4	1.18	1.86			4	0.6	0.95		4	1.12	2.18	0.95			4	2.29	1.9		4	1.51	0.3
5	5.94	0.81	0.53	0.7	0.49		5	0.83	0.53			5	0.66	0.53		5	1.25	0.92	0.72			5	0.3	0.27		5	1.16	0.4
6	9.5	0.63	2.83	2.54	1.89		6	3.2	2.4			6	0	0.17		6	0.18	0.2	0.37			6	0.4	0.67		6	3.9	0.68
7	10	0.18	1.99	1.45	0.049		7	2.6	0.6			7	0	0.067		7	2.66	1.52	1.79			7	1.58	0.29		7	3.21	0.32
8	1	0.13	0.6	1.6	0.35		8	3.16	1.66			8	0.48	0.33		8	1.52	0.44	1.29			8	3.21	3		8	3.56
9	7.72	0.97	0.66	0.76	0.78		9					9	2.05	0.18								9	0.27	1.38		9	3.29
10	2.49	1.04	0		0.066							10	0.1	0.28								10	0.68	0.27		10	1.37
11	7.45	2.02	0									11	0.68	2.37								11	1.37	0.85		11
12	3.87	0.24	0.48
13		1.23
HC= healthy control
PHI= Primary HIV infection
CHI= Chronic HIV infection
EC=Elite controller
VC=Viraemic controller
