# Supplementary material for: Human MAIT cells respond to and suppress HIV-1
Source: eLife. 2021 Dec 24;10:e50324. doi: 10.7554/eLife.50324 (PMC8752121; doi:10.7554/eLife.50324)
Supplement: Figure 3—source data 1. — (A) percentage of MAIT cells expressing IFN-γ upon in vitro stimulation with fixed E. coli or HIVBAL in the presence or absence of blocking antibodies directed against IL-12 and IL-18. (B) frequency of GFP positive CEM-GXR cells following infection with HIVBAL (MOI = 0.2) and pre-treatment with stimulated supernatant from MAIT cells. (C) HIVJRFL-GFP infection in primary human PBMCs or CEM-CCR5 cells by addition of control or IL-12/18-treated supernatants obtained from MACS-enriched CD8s (top) or FACS-sorted MAIT cells (bottom). [file elife-50324-fig3-data1.xlsx]

## Sheet: Figure 3
Figure 3A
	No Stim	E.coli	E.coli + anti-IL12/18	HIV-BaL	HIV-BaL + anti-IL12/18
D1	0.68	13	0	19	3.97
D2	0.84	51.7	0.21	17.5	4.52
D3	0.79	37.5	3.45	14.45	1.67
D4	1.05	31	12.3	29.5	4.75
D5	0.76	9.58	3.05	8.7	3.2
D6	0.66	3.48	0.85	2.34	0.7
D7	0.5	14.5	7.69	19.7	7.3
D8	0.58	24.8	2.36	6.56	1.62
Figure 3B
	No Stim	CEM-GXR +HIV-BaL	Unstim +HIV-BaL	Stim +HIV-BaL
D1	0.63	9	8.45	4.34
D2	0.54	8.22	9.12	4.28
D3	0.4	8.6	8.97	3.42
D4	0.5	8.3	8.76	3.5
D5	0.18	2.47	2.56	0.67
D6	0.03	3.31	3.15	0.66
D7	0.11	4.92	4.25	2.09
D8	0.12	3.49	3.36	1.49
Figure 3C
CD8
	No Virus	PBMC + JR-FL-GFP	PBMC + Unstim + JR-FL-GFP	PBMC + Stim + JR-FL-GFP
D1	5.26	17.5	17	8.27
D2	5.38	12.1	12.95	8.9
D3	5.34	14.75	13.05	10.45
D4	5.76	15.35	16.45	8.31
D5	5.26	17.5	17	8.27
D6	5.38	12.1	12.95	8.9
D7	5.34	14.75	13.05	10.45
MAIT
	No Virus	CEM+JRFL-GFP	CEM+Unstim+JRFL-GFP	CEM+Stim+JRFL-GFP
D1	0.05	30.8	35	29.6
D2	0.045	29.3	34.9	32.7
D3	0.13	20.1	31.5	30.1
D4	0.11	22.8	22.7	17.4
D5	0.086	32.6	11.5	9.17
D6	0.11	35	13.2	10.4
D7	0.4	11.7
D8	0.48	12
