# Supplementary material for: Human MAIT cells respond to and suppress HIV-1
Source: eLife. 2021 Dec 24;10:e50324. doi: 10.7554/eLife.50324 (PMC8752121; doi:10.7554/eLife.50324)
Supplement: Figure 4—source data 1. — CCL4 (MIP-1β) concentration was measured in the supernatants by ELISA after 20 hr post stimulation with IL-12/18. (B) Concentrations of CCL3 (MIP1α) and CCL5 (RANTES) were measured in the supernatants by cytometric bead array (CBA) after 20 hr post stimulation with IL-12/18. (C) Expression of CCL4 by MAITs after incubation with IL-12/18 for 20 hr. MAIT cells were identified as CD161++ Vα7.2+ cells within MACS-enriched CD8s. (D) Percentage of MAIT cells as identified by co-expression of Vα7.2 with high levels of CD161 within MACS-enriched CD8s and within all CCL4-expressing CD8 T cells from the same culture. CD8 T cells were stimulated with IL-12/18 for 20 hr. (E) GFP-positive CEM-GXR cells following blocking of restriction factors (CCL3/4/5), after treatment with IL12/18 stimulated supernatant from CD8 cells and infection with HIVBAL. [file elife-50324-fig4-data1.xlsx]

## Sheet: Sheet1
Figure 4A
	US	S
PK10	Undetectable	15.55
PK13	Undetectable	39.49
PK14	Undetectable	21.11
PK15	Undetectable	78.09
Figure 4B
	CCL3				CCL5
donor	control	IL12/18		donor	control	IL12/18
PK10	0.0507092	6.78117		PK10	0.735865	35.5948
PK13	0.0005	22.9257		PK13	0.855494	26.5014
PK14	0.0006	19.9627		PK14	0.69675	10.7477
PK15	0.0132323	52.2797		PK15	0.795259	43.2955
Figure 4C
	US	S
D1	0.9	9.9
D2	0.59	4.75
D3	0.04	5.04
D4	0.389	5.86
Figure 4D
donor	% MAIT among total CD8	% MAIT among MIP1b+ CD8
PK10	0.131	0.753
PK13	0.161	0.827
PK14	0.0809	0.31
PK15	0.232	0.634
Figure 4E
	CEM-GXR +HIV-BaL	Stim +HIV-BaL	Stim +HIV-BaL+ anti-CCL3/4/5
D1	13.7	7.55	10.94
D2	14.2	8.18	11.9
D3	19.8	10	15.8
D4	15.4	9.2	17.4
