# Supplementary figures and images for: Human MAIT cells respond to and suppress HIV-1
Source: eLife journal article supplement (doi:10.7554/elife.50324), 2021-12-24

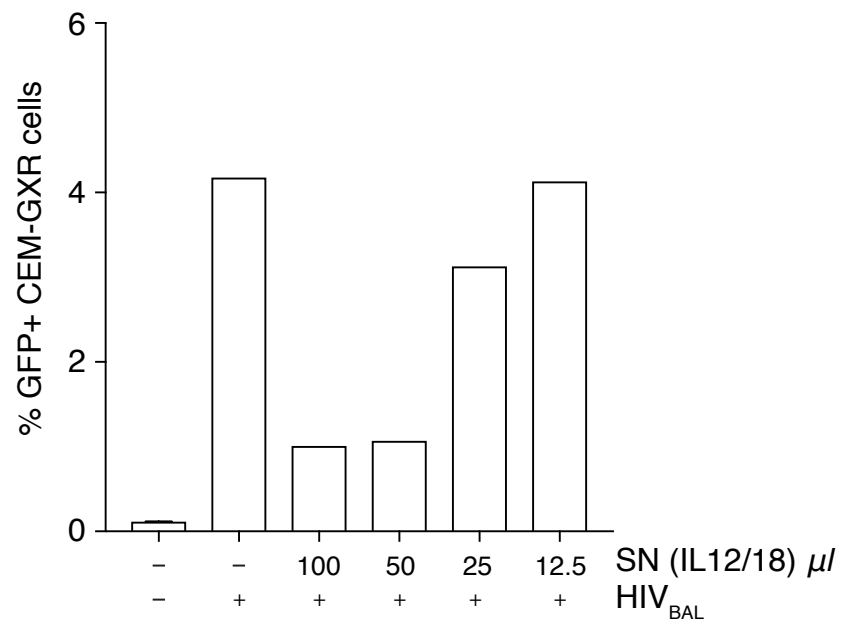

Supplement: supp [file elife-50324-supp-v1.zip]

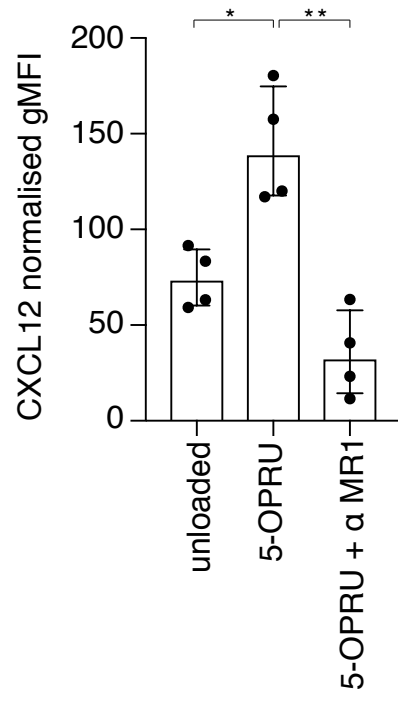

Supplement: supp [file elife-50324-supp-v1.zip]

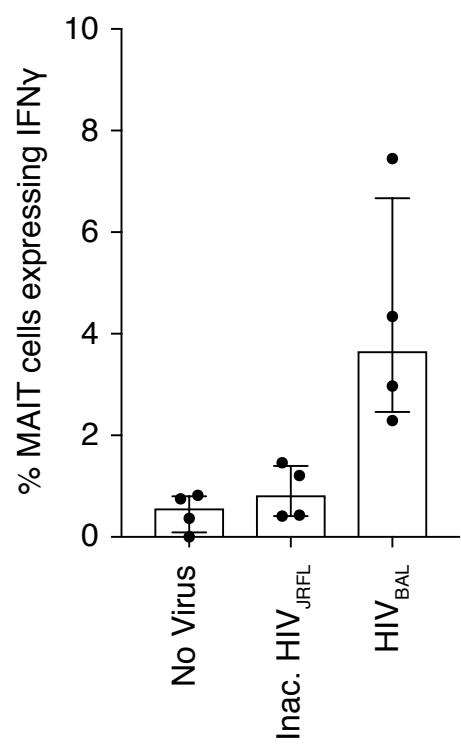

Supplement: supp [file elife-50324-supp-v1.zip]

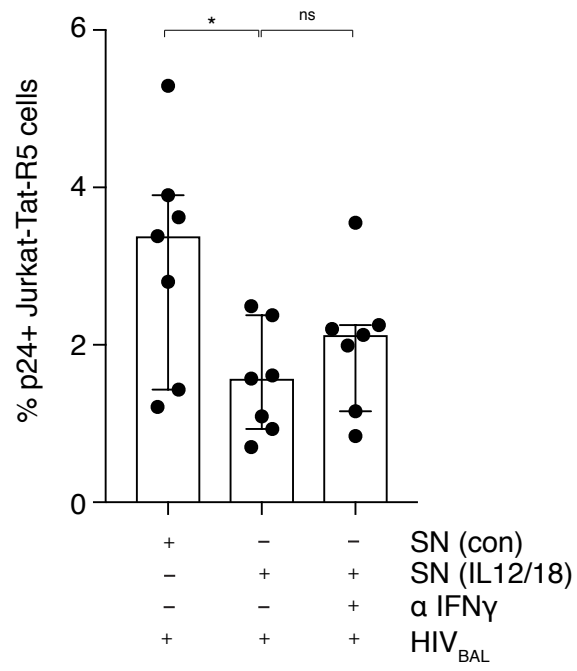

Supplement: supp [file elife-50324-supp-v1.zip]

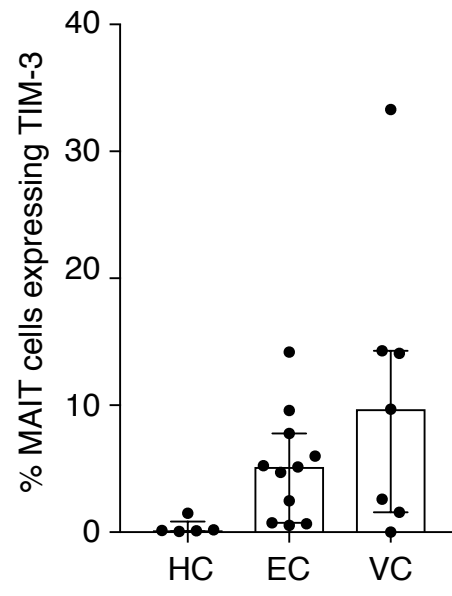

Supplement: supp [file elife-50324-supp-v1.zip]

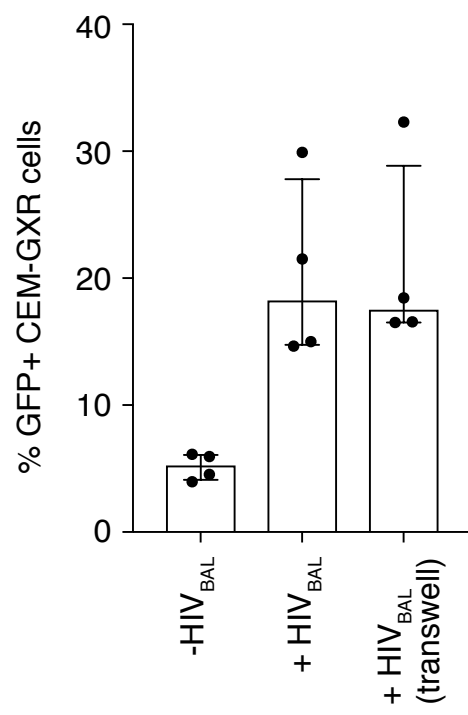

Supplement: supp [file elife-50324-supp-v1.zip]

A.

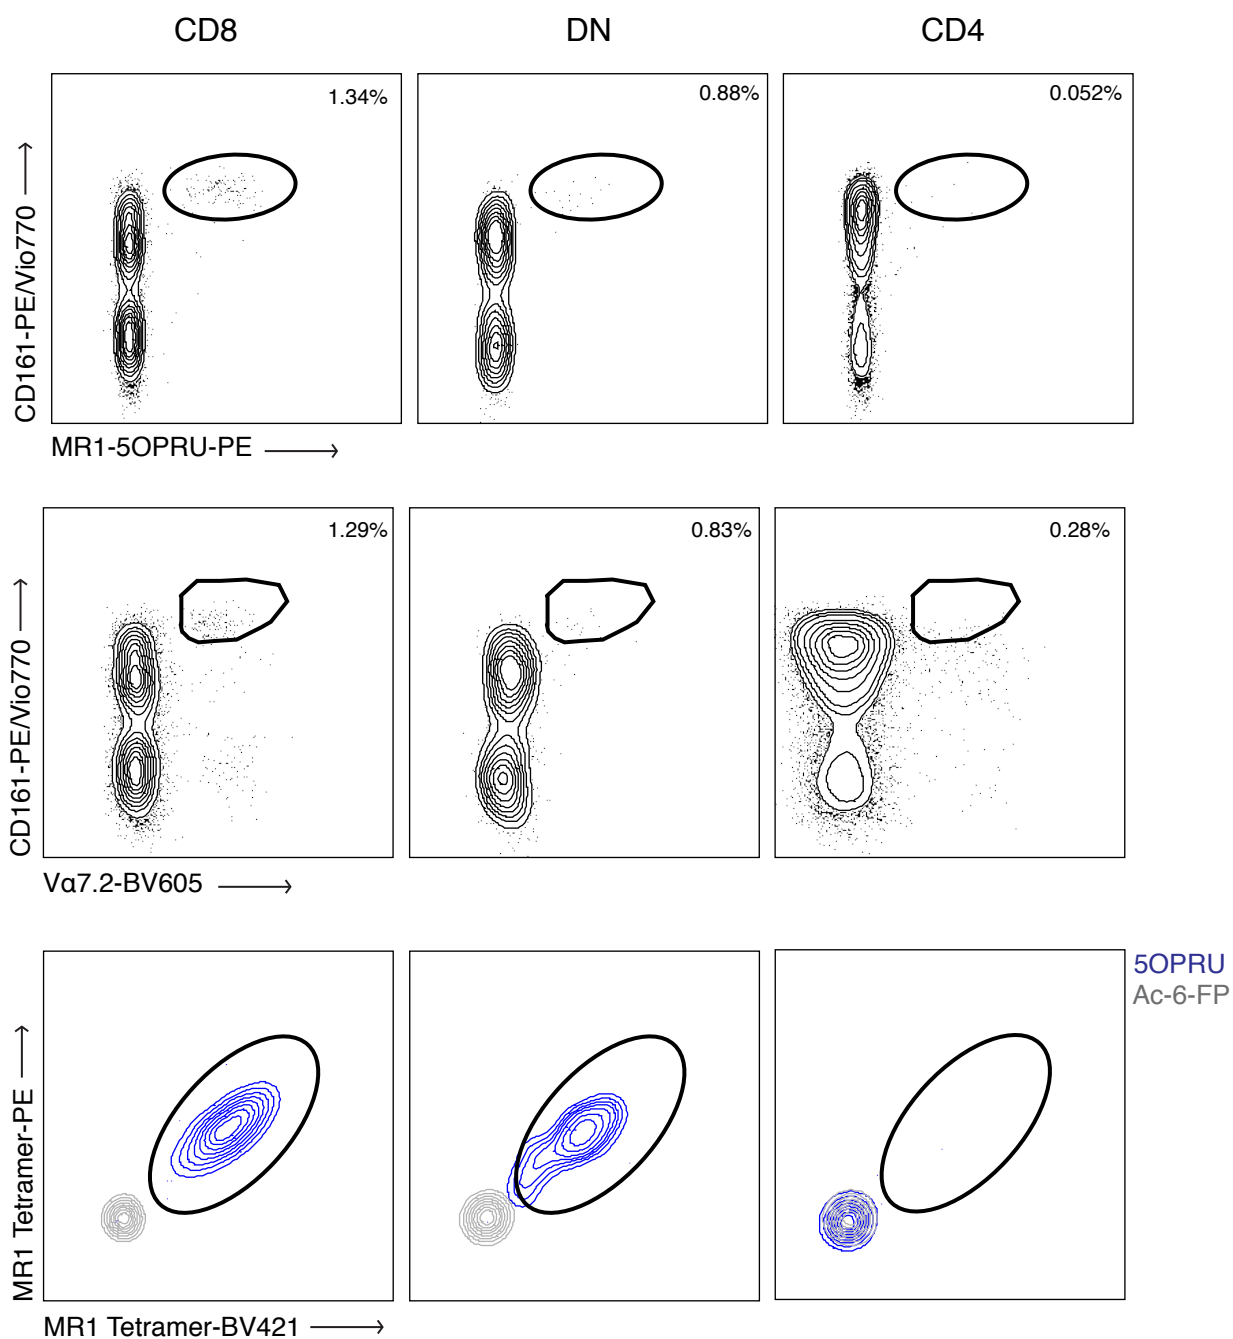

B.

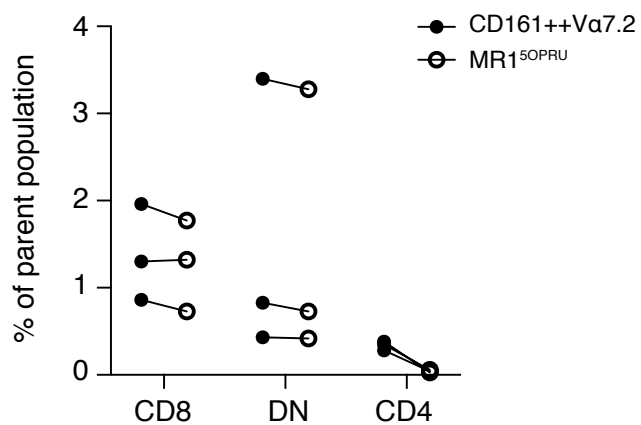

C.

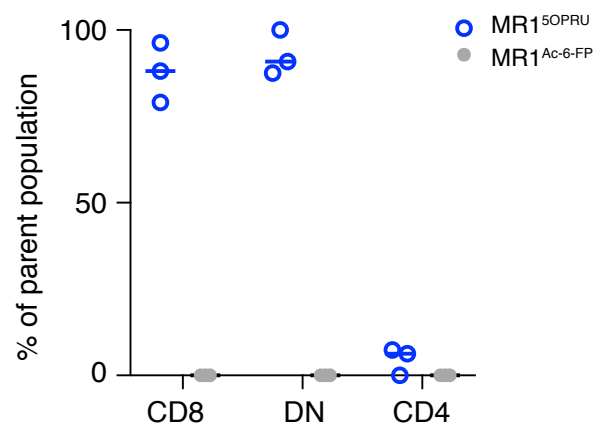

Supplement: supp [file elife-50324-supp-v1.zip]

A.

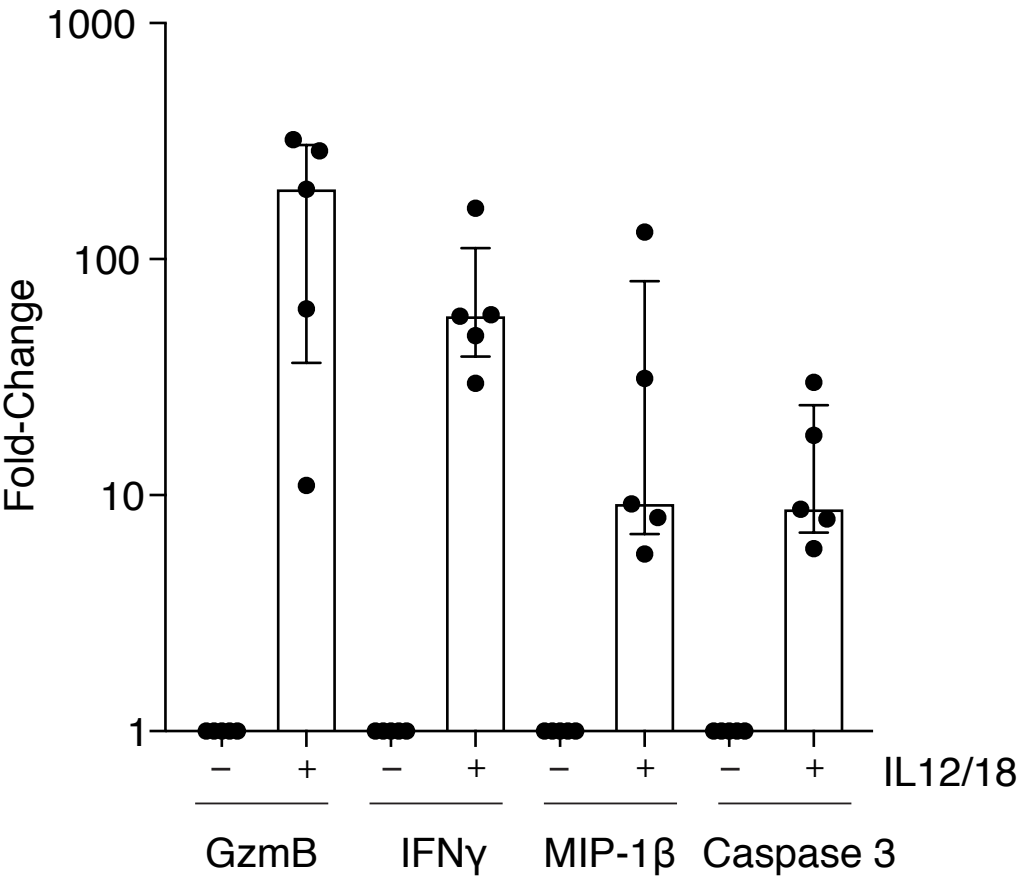

Supplement: supp [file elife-50324-supp-v1.zip]

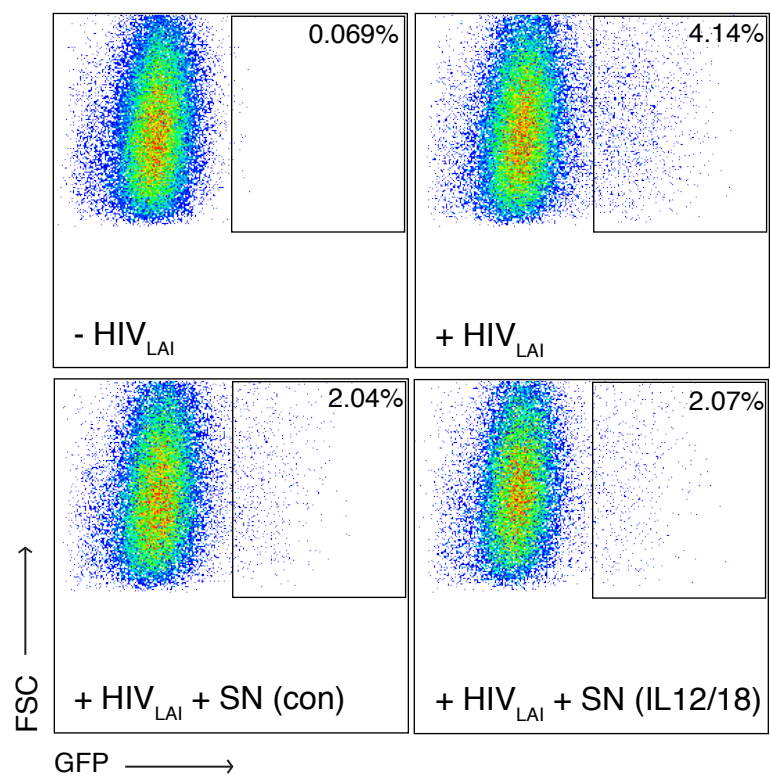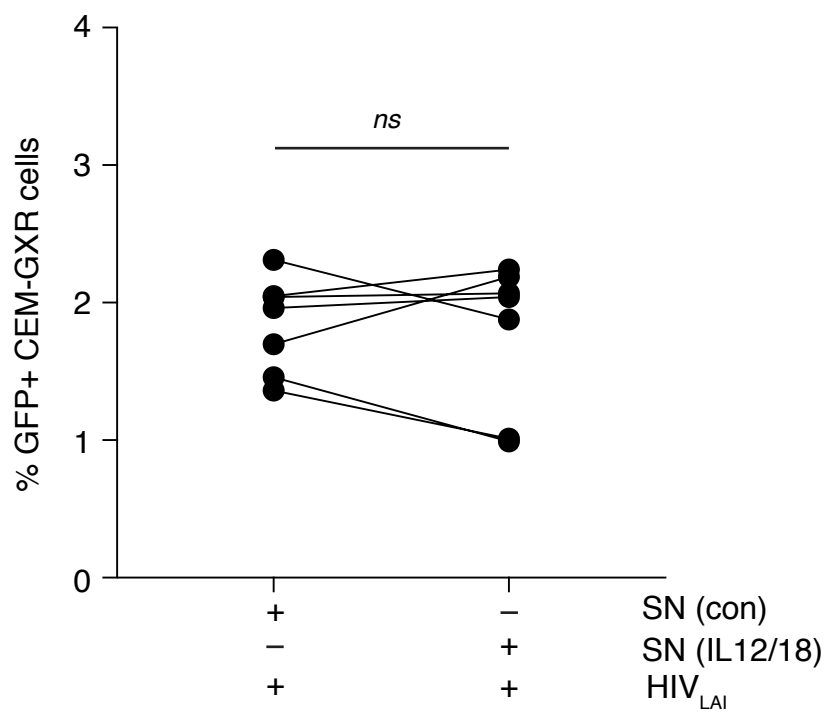

Supplement: supp [file elife-50324-supp-v1.zip]
